# Supplementary material
Source: PubMed Central journal article supplement (PMC6648289)
Supplement: ao9b00434_si_001.pdf [file ao9b00434_si_001.pdf]

## Supporting Information

# Synthesis and Pharmacological Evaluation of [<sup>11</sup>C]4-Methoxy-N-[2-(thiophen-2-yl)imidazo[1,2-a]pyridin-3-yl]benzamide as a Brain Penetrant PET Ligand selective for the $\delta$ -Subunit-Containing $\gamma$ -Aminobutyric Acid Type A Receptors

Elina T. L'Estrade,<sup>§</sup>  $\square$   $\ddagger$  Hanne D. Hansen,<sup>†</sup>  $\ddagger$  Christina Falk-Petersen,<sup>§</sup> Anne Haugaard,<sup>§</sup> Nane Griem-Krey,<sup>§</sup> Sascha Jung,<sup>||</sup> Hartmut Lüddens,<sup>a</sup> Tanja Schirmeister,<sup>||</sup> Maria Erlandsson,<sup>□</sup> Tomas Ohlsson,<sup>□</sup> Gitte M. Knudsen,<sup>†</sup> Matthias M. Herth,<sup>§</sup>  $\ddagger$  Petrine Wellendorph,<sup>§</sup> Bente Frølund<sup>§\*</sup>

<sup>§</sup>Department of Drug Design and Pharmacology, Faculty of Health and Medical Sciences, University of Copenhagen, Universitetsparken 2, 2100 Copenhagen, Denmark

<sup>†</sup>Neurobiology Research Unit and CIMBI, Copenhagen University Hospital, Rigshospitalet, Blegdamsvej 9, 2100 Copenhagen, Denmark

$\square$  Radiation Physics, Nuclear Medicine Physics Unit, Skånes University Hospital, Barngatan 3, Lund 222 42, Sweden

<sup>\*</sup>Department of Clinical Physiology, Nuclear Medicine and PET, University Hospital Copenhagen, Rigshospitalet Blegdamsvej 9, 2100 Copenhagen, Denmark

<sup>a</sup>Department of Psychiatry and Psychotherapy, Faculty of Health and Medical Sciences, University of Medical Center Mainz, D-55131, Germany

<sup>||</sup>Institute of Pharmacy & Biochemistry, Johannes Gutenberg University Mainz, D-55128, Germany

Corresponding Author

\* Phone: +45 35 33 64 95. E-mail: bfr@sund.ku.dk

## Contents

|                                                                          |   |
|--------------------------------------------------------------------------|---|
| Results .....                                                            | 2 |
| <i>Selectivity profiling:</i> .....                                      | 2 |
| <i>Radiolabeling of [<sup>11</sup>C]DS2OMe ([<sup>11</sup>C]1)</i> ..... | 2 |
| <i>Distribution volumes and metabolism of [<sup>11</sup>C]1</i> .....    | 3 |
| <i>Radiometabolism in pigs</i> .....                                     | 4 |

## Results

### Selectivity profiling:

**Supporting Table S1:** In the table is included the targets for which DS2OMe showed less than 50% inhibition at 10  $\mu$ M in the National Institute of Mental Health's Psychoactive Drug Screening Program (NIMH-PDSP).

| Receptors (<50% inhibition at 10 $\mu$ M) |         |     |         |
|-------------------------------------------|---------|-----|---------|
| 5-HT1A                                    | Alpha1A | D4  | M2      |
| 5-HT1B                                    | Alpha1B | D5  | M4      |
| 5-HT1D                                    | Alpha1D | DAT | M5      |
| 5-HT1e                                    | Alpha2A | DOR | MOR     |
| 5-HT2A                                    | Alpha2B | H1  | NET     |
| 5-HT2B                                    | Beta1   | H2  | SERT    |
| 5-HT2C                                    | Beta2   | H3  | Sigma 1 |
| 5-HT3                                     | Beta3   | H4  | Sigma 2 |
| 5-HT5a                                    | D1      | KOR |         |
| 5-HT6                                     | D2      | M1  |         |
| 5-HT7                                     | D3      | M3  |         |

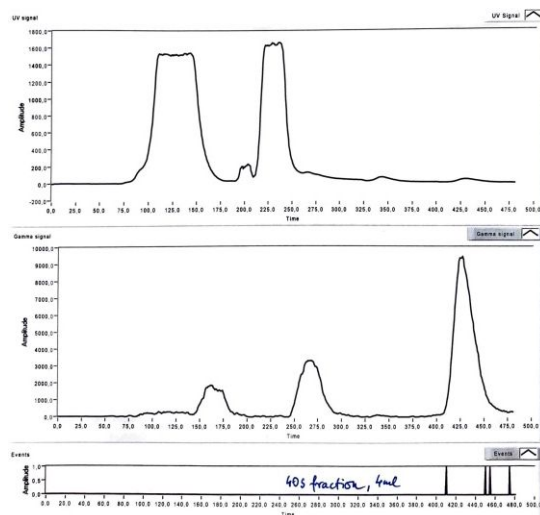

**Supporting Figure S1:** Semi-preparative HPLC chromatogram of radiolabeling of  $[^{11}\text{C}]$ DS2OMe ( $[^{11}\text{C}]$ 1).

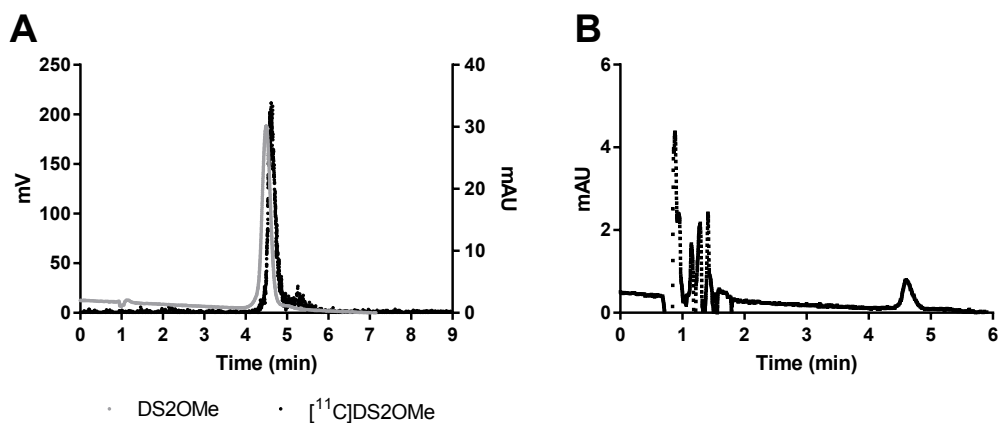

**Supporting Figure S2: A)** DS2OMe (**1**) (grey line) and [<sup>11</sup>C]DS2OMe ([<sup>11</sup>C]**1**)(black line) HPLC chromatograms. **B)** Product UV HPLC chromatogram

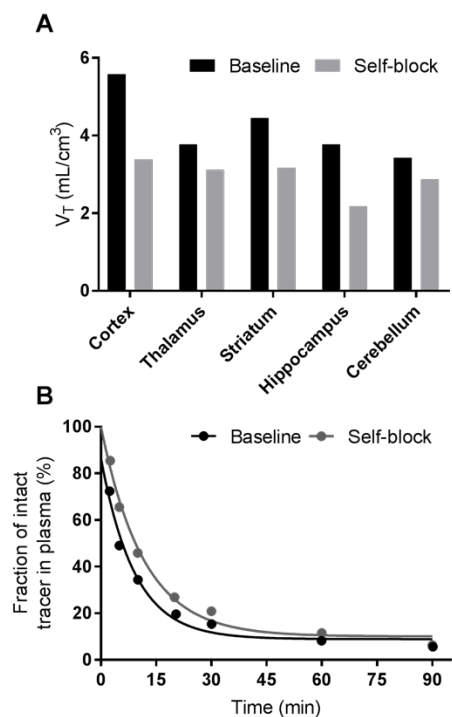

**Supporting figure S3: A)** Total distribution volumes ( $V_T$ ) for the five indicated regions of interest at baseline (black) and after administration of 2.1 mg/kg unlabeled **1** (co-administrated with the tracer). **B)** HPLC analysis of [<sup>11</sup>C]**1** in pig plasma as a function of time after intravenous injection of [<sup>11</sup>C]**1** (baseline, black symbols) or after administration of 2.1 mg/kg unlabeled **1** (co-administrated with the tracer, self-block, grey symbols).

### Radiometabolism in pigs

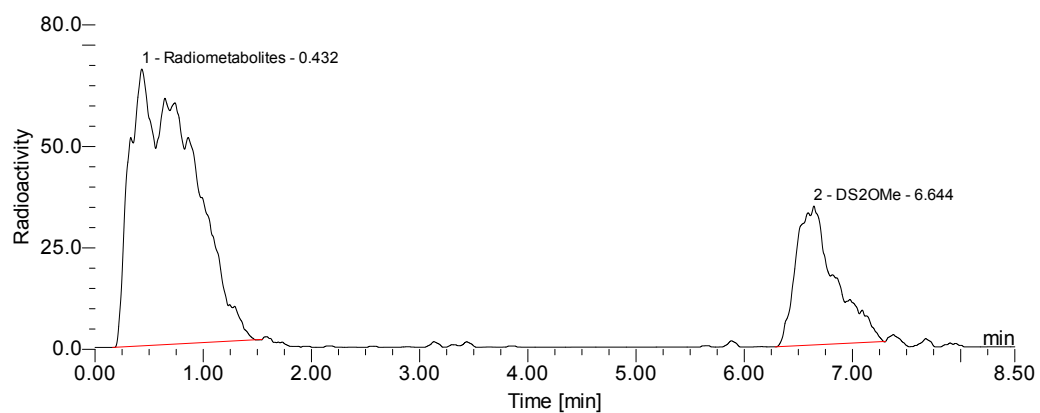

**Supporting figure S4:** Representative radio-chromatogram of pig plasma sample taken 20 min after injection with [ $^{11}\text{C}$ ]DS2OMe.
